# Supplementary material for: Correlation consistent basis sets for explicitly correlated wavefunctions: valence and core–valence basis sets for Li, Be, Na, and Mg
Source: Royal Society of Chemistry journal article supplement (doi:10.1039/c0cp00020e), 2010-01-01
Supplement: c0cp00020e.pdf [file c0cp00020e.pdf]

# Correlation consistent basis sets for explicitly correlated wavefunctions: Valence and core-valence basis sets for Li, Be, Na, and Mg

**J. Grant Hill and Kirk A. Peterson<sup>1</sup>**

*Department of Chemistry, Washington State University, Pullman, Washington 99164, USA.*

## Supplementary Information

---

<sup>1</sup> kipeters@wsu.edu

Table SI. DF error in select orbital and auxiliary basis combinations for Na<sub>2</sub> and Mg.

| System          | Orbital basis   | DF basis    | $E_{MP2}^{corr}$ ( $mE_h$ ) | $E_{DF-MP2}^{corr}$ ( $mE_h$ ) | DF error ( $\mu E_h$ ) |
|-----------------|-----------------|-------------|-----------------------------|--------------------------------|------------------------|
| Na <sub>2</sub> | cc-pVDZ         | cc-pVDZ     | -17.240                     | -17.196                        | -44.1                  |
|                 | cc-pV(D+d)Z     | cc-pVDZ     | -17.343                     | -17.297                        | -45.8                  |
|                 | aug-cc-pVDZ     | aug-cc-pVDZ | -17.435                     | -17.419                        | -15.5                  |
|                 | aug-cc-pV(D+d)Z | aug-cc-pVDZ | -17.510                     | -17.495                        | -15.3                  |
|                 | cc-pVTZ         | cc-pVTZ     | -19.149                     | -19.122                        | -26.8                  |
|                 | cc-pV(T+d)Z     | cc-pVTZ     | -19.155                     | -19.128                        | -27.2                  |
|                 | aug-cc-pVTZ     | aug-cc-pVTZ | -19.308                     | -19.298                        | -9.7                   |
|                 | aug-cc-pV(T+d)Z | aug-cc-pVTZ | -19.314                     | -19.304                        | -9.8                   |
|                 | cc-pVQZ         | cc-pVQZ     | -19.801                     | -19.756                        | -44.5                  |
|                 | cc-pV(Q+d)Z     | cc-pVQZ     | -19.798                     | -19.760                        | -37.8                  |
|                 | aug-cc-pVQZ     | aug-cc-pVQZ | -19.901                     | -19.884                        | -17.1                  |
|                 | aug-cc-pV(Q+d)Z | aug-cc-pVQZ | -19.903                     | -19.887                        | -15.6                  |
|                 | cc-pV5Z         | cc-pV5Z     | -20.125                     | -20.118                        | -7.4                   |
|                 | cc-pV(5+d)Z     | cc-pV5Z     | -20.125                     | -20.118                        | -7.5                   |
|                 | aug-cc-pV5Z     | aug-cc-pV5Z | -20.197                     | -20.194                        | -3.1                   |
|                 | aug-cc-pV(5+d)Z | aug-cc-pV5Z | -20.197                     | -20.194                        | -3.1                   |
| Mg              | cc-pVDZ         | cc-pVDZ     | -21.343                     | -21.343                        | -0.8                   |
|                 | cc-pV(D+d)Z     | cc-pVDZ     | -21.421                     | -21.419                        | -2.0                   |
|                 | aug-cc-pVDZ     | aug-cc-pVDZ | -21.691                     | -21.691                        | -0.7                   |
|                 | aug-cc-pV(D+d)Z | aug-cc-pVDZ | -21.773                     | -21.771                        | -1.6                   |
|                 | cc-pVTZ         | cc-pVTZ     | -23.535                     | -23.534                        | -0.2                   |
|                 | cc-pV(T+d)Z     | cc-pVTZ     | -23.549                     | -23.548                        | -0.3                   |
|                 | aug-cc-pVTZ     | aug-cc-pVTZ | -23.713                     | -23.712                        | -0.2                   |
|                 | aug-cc-pV(T+d)Z | aug-cc-pVTZ | -23.726                     | -23.726                        | -0.2                   |
|                 | cc-pVQZ         | cc-pVQZ     | -24.320                     | -24.320                        | -0.2                   |
|                 | cc-pV(Q+d)Z     | cc-pVQZ     | -24.315                     | -24.314                        | -1.3                   |
|                 | aug-cc-pVQZ     | aug-cc-pVQZ | -24.444                     | -24.444                        | -0.2                   |
|                 | aug-cc-pV(Q+d)Z | aug-cc-pVQZ | -24.435                     | -24.434                        | -0.4                   |
|                 | cc-pV5Z         | cc-pV5Z     | -24.684                     | -24.684                        | -0.2                   |
|                 | cc-pV(5+d)Z     | cc-pV5Z     | -24.683                     | -24.682                        | -0.3                   |
|                 | aug-cc-pV5Z     | aug-cc-pV5Z | -24.775                     | -24.775                        | -0.1                   |
|                 | aug-cc-pV(5+d)Z | aug-cc-pV5Z | -24.768                     | -24.768                        | -0.2                   |

TABLE SII. CCSD(T)-F12b optimized geometries and harmonic frequencies with the cc-pVnZ-F12 (denoted VnZ-F12) and cc-pCVnZ-F12 (denoted CVnZ-F12) families of basis sets.

| Molecule                                                     | Basis set | Bond Length (Å) | Frequency (cm <sup>-1</sup> ) | Basis set             | Bond Length (Å) | Frequency (cm <sup>-1</sup> ) |
|--------------------------------------------------------------|-----------|-----------------|-------------------------------|-----------------------|-----------------|-------------------------------|
| Li <sub>2</sub> ( <sup>1</sup> Σ <sub>g</sub> <sup>+</sup> ) | VDZ-F12   | 2.7001          | 348.3                         | CVDZ-F12              | 2.6751          | 354.0                         |
|                                                              | VTZ-F12   | 2.6991          | 348.4                         | CVTZ-F12              | 2.6729          | 360.5                         |
|                                                              | VQZ-F12   | 2.6990          | 348.4                         | CVQZ-F12              | 2.6734          | 353.6                         |
| LiF ( <sup>1</sup> Σ <sup>+</sup> )                          | VDZ-F12   | 1.5799          | 901.1                         | CVDZ-F12              | 1.5638          | 916.3                         |
|                                                              | VTZ-F12   | 1.5802          | 900.6                         | CVTZ-F12              | 1.5643          | 914.3                         |
|                                                              | VQZ-F12   | 1.5801          | 900.4                         | CVQZ-F12              | 1.5642          | 914.3                         |
| BeO ( <sup>1</sup> Σ <sup>+</sup> )                          | VDZ-F12   | 1.3376          | 1476.4                        | CVDZ-F12 <sup>†</sup> | 1.3311          | 1488.4                        |
|                                                              | VTZ-F12   | 1.3373          | 1475.3                        | CVTZ-F12              | 1.3306          | 1489.4                        |
|                                                              | VQZ-F12   | 1.3365          | 1478.7                        | CVQZ-F12              | 1.3299          | 1493.2                        |
| BeF ( <sup>2</sup> Σ <sup>+</sup> )                          | VDZ-F12   | 1.3684          | 1255.6                        | CVDZ-F12              | 1.3619          | 1266.1                        |
|                                                              | VTZ-F12   | 1.3679          | 1255.5                        | CVTZ-F12              | 1.3614          | 1266.4                        |
|                                                              | VQZ-F12   | 1.3673          | 1256.7                        | CVQZ-F12              | 1.3610          | 1267.3                        |
| Na <sub>2</sub> ( <sup>1</sup> Σ <sub>g</sub> <sup>+</sup> ) | VDZ-F12   | 3.1780          | 152.6                         | CVDZ-F12 <sup>†</sup> | 3.0902          | 159.0                         |
|                                                              | VTZ-F12   | 3.1791          | 152.5                         | CVTZ-F12              | 3.0811          | 159.3                         |
|                                                              | VQZ-F12   | 3.1793          | 152.5                         | CVQZ-F12              | 3.0770          | 150.3                         |
| NaF ( <sup>1</sup> Σ <sup>+</sup> )                          | VDZ-F12   | 1.9853          | 540.6                         | CVDZ-F12              | 1.9270          | 535.7                         |
|                                                              | VTZ-F12   | 1.9876          | 540.7                         | CVTZ-F12              | 1.9273          | 535.3                         |
|                                                              | VQZ-F12   | 1.9888          | 540.4                         | CVQZ-F12              | 1.9266          | 535.4                         |
| MgO ( <sup>1</sup> Σ <sup>+</sup> )                          | VDZ-F12   | 1.7558          | 786.4                         | CVDZ-F12              | 1.7382          | 811.8                         |
|                                                              | VTZ-F12   | 1.7530          | 796.2                         | CVTZ-F12              | 1.7370          | 816.7                         |
|                                                              | VQZ-F12   | 1.7530          | 797.7                         | CVQZ-F12              | 1.7372          | 816.7                         |
| MgF ( <sup>2</sup> Σ <sup>+</sup> )                          | VDZ-F12   | 1.7641          | 710.8                         | CVDZ-F12              | 1.7500          | 719.9                         |
|                                                              | VTZ-F12   | 1.7646          | 710.1                         | CVTZ-F12              | 1.7508          | 718.4                         |
|                                                              | VQZ-F12   | 1.7643          | 710.4                         | CVQZ-F12              | 1.7505          | 718.5                         |

<sup>†</sup> Harmonic frequencies obtained from a Dunham analysis based on near-equilibrium potential energy functions. See text for further details.

TABLE SIII. CCSD(T)-F12b optimized geometries ( $\text{\AA}$ ) and harmonic frequencies ( $\omega_n$ , in  $\text{cm}^{-1}$ ) with the cc-pVnZ-F12 (denoted VnZ-F12) and cc-pCVnZ-F12 (denoted CVnZ-F12, calculated with all-electrons correlated) families of basis sets.

| Molecule                               | Basis   | Bond 1 | Bond 2 | $\omega_1$ | $\omega_2$ | $\omega_3$ | Basis     | Bond 1              | Bond 2 | $\omega_1$ | $\omega_2$ | $\omega_3$ |
|----------------------------------------|---------|--------|--------|------------|------------|------------|-----------|---------------------|--------|------------|------------|------------|
| $\text{BeH}_2 ({}^1\Sigma_g^+)$        | VDZ-F12 | 1.3312 |        | 715.5      | 2040.1     | 2247.4     | CVDZ-F12  | 1.3263 <sup>†</sup> |        | 718.4      | 2050.0     | 2262.3     |
|                                        | VTZ-F12 | 1.3310 |        | 714.1      | 2040.8     | 2249.0     | CVTZ-F12  | 1.3264              |        | 716.8      | 2050.2     | 2259.6     |
|                                        | VQZ-F12 | 1.3307 |        | 713.7      | 2041.6     | 2249.7     | CVQZ-F12  | 1.3260              |        | 717.1      | 2051.0     | 2260.3     |
| $\text{BeF}_2 ({}^1\Sigma_g^+)$        | VDZ-F12 | 1.3801 |        | 341.4      | 726.0      | 1573.2     | CVDZ-F12* | 1.3739 <sup>†</sup> |        | 339.1      | 731.5      | 1585.5     |
|                                        | VTZ-F12 | 1.3792 |        | 339.9      | 726.1      | 1576.6     | CVTZ-F12  | 1.3734              |        | 341.6      | 731.9      | 1586.2     |
|                                        | VQZ-F12 | 1.3787 |        | 339.3      | 726.5      | 1577.1     | CVQZ-F12  | 1.3731              |        | 341.9      | 732.2      | 1586.7     |
| $\text{MgH}_2 ({}^1\Sigma_g^+)$        | VDZ-F12 | 1.7097 |        | 432.5      | 1600.4     | 1623.3     | CVDZ-F12  | 1.6964              |        | 437.9      | 1614.0     | 1637.1     |
|                                        | VTZ-F12 | 1.7101 |        | 433.9      | 1599.4     | 1622.8     | CVTZ-F12  | 1.6970              |        | 435.8      | 1615.8     | 1639.3     |
|                                        | VQZ-F12 | 1.7098 |        | 433.1      | 1600.2     | 1623.7     | CVQZ-F12  | 1.6965              |        | 436.8      | 1617.7     | 1640.9     |
| $\text{MgF}_2 ({}^1\Sigma_g^+)$        | VDZ-F12 | 1.7522 |        | 149.6      | 565.2      | 875.9      | CVDZ-F12  | 1.7378              |        | 150.5      | 573.3      | 888.4      |
|                                        | VTZ-F12 | 1.7529 |        | 150.0      | 564.0      | 875.2      | CVTZ-F12  | 1.7383              |        | 149.9      | 572.0      | 888.0      |
|                                        | VQZ-F12 | 1.7525 |        | 150.2      | 564.1      | 875.8      | CVQZ-F12  | 1.7380              |        | 151.5      | 572.1      | 887.8      |
| $\text{Li}_2\text{O} ({}^1\Sigma_g^+)$ | VDZ-F12 | 1.6287 |        | 91.5       | 783.1      | 1028.1     | CVDZ-F12  | 1.6132 <sup>†</sup> |        | 87.3       | 792.1      | 1040.2     |
|                                        | VTZ-F12 | 1.6287 |        | 109.7      | 782.6      | 1027.7     | CVTZ-F12  | 1.6138              |        | 109.7      | 794.4      | 1040.8     |
|                                        | VQZ-F12 | 1.6285 |        | 113.5      | 782.7      | 1028.6     | CVQZ-F12  | 1.6134              |        | 113.6      | 794.9      | 1042.8     |
| $\text{Na}_2\text{O} ({}^1\Sigma_g^+)$ | VDZ-F12 | 2.0140 |        | 18.3       | 348.8      | 668.5      | CVDZ-F12  | 1.9813 <sup>†</sup> |        | 29.5       | 359.5      | 680.5      |
|                                        | VTZ-F12 | 2.0137 |        | 29.6       | 348.9      | 668.8      | CVTZ-F12  | 1.9809              |        | 29.2       | 357.7      | 684.2      |
|                                        | VQZ-F12 | 2.0140 |        | 39.8       | 348.8      | 669.0      | CVQZ-F12  | 1.9802              |        | 38.4       | 358.6      | 686.6      |

|                         |         |        |        |       |       |        |          |        |        |       |       |        |
|-------------------------|---------|--------|--------|-------|-------|--------|----------|--------|--------|-------|-------|--------|
| LiOH ( $^1\Sigma_g^+$ ) | VDZ-F12 |        |        |       |       |        | CVDZ-F12 |        |        |       |       |        |
|                         |         | 1.5946 | 0.9486 | 331.7 | 940.0 | 4023.7 |          | 1.5787 | 0.9473 | 338.6 | 956.6 | 4035.8 |
|                         | VTZ-F12 | 1.5942 | 0.9487 | 327.5 | 940.6 | 4019.3 | CVTZ-F12 | 1.5783 | 0.9478 | 340.1 | 956.7 | 4025.7 |
|                         | VQZ-F12 | 1.5942 | 0.9485 | 331.7 | 940.0 | 4020.7 | CVQZ-F12 | 1.5783 | 0.9477 | 345.9 | 956.5 | 4026.8 |
| NaOH ( $^1\Sigma_g^+$ ) | VDZ-F12 |        |        |       |       |        | CVDZ-F12 |        |        |       |       |        |
|                         |         | 1.9714 | 0.9516 | 247.5 | 554.4 | 3972.9 |          | 1.9380 | 0.9500 | 253.6 | 567.8 | 3988.2 |
|                         | VTZ-F12 | 1.9712 | 0.9517 | 233.3 | 554.7 | 3968.3 | CVTZ-F12 | 1.9372 | 0.9507 | 239.1 | 568.4 | 3976.4 |
|                         | VQZ-F12 | 1.9715 | 0.9515 | 234.4 | 554.2 | 3969.8 | CVQZ-F12 | 1.9364 | 0.9505 | 238.4 | 568.7 | 3977.5 |

<sup>†</sup> Harmonic frequencies calculated *via* second order perturbation theory with the SURFIT program. See text for further details.

\* Slight symmetry breaking required for a true minimum.

TABLE SIV. CCSD(T)-F12b atomization energies calculated with the cc-pVnZ-F12 (shortened below to VnZ-F12) and cc-pCVnZ-F12 (CVnZ-F12) families of basis sets. V(T,Q)Z-F12 and CV(T,Q)Z-F12 estimates of the CBS limits obtained by extrapolation with a Schwenke-type formula, see text for further details. All calculations with the cc-pCVnZ-F12 basis sets were performed “all-electron”.

| Molecule          | Atomization energy (kcal mol <sup>-1</sup> ) |         |         |             |          |          |          |              |
|-------------------|----------------------------------------------|---------|---------|-------------|----------|----------|----------|--------------|
|                   | VDZ-F12                                      | VTZ-F12 | VQZ-F12 | V(T,Q)Z-F12 | CVDZ-F12 | CVTZ-F12 | CVQZ-F12 | CV(T,Q)Z-F12 |
| Li <sub>2</sub>   | 23.881                                       | 24.041  | 24.052  | 24.055      | 24.087   | 24.325   | 24.312   | 24.314       |
| LiF               | 136.408                                      | 137.724 | 138.180 | 138.399     | 137.914  | 138.916  | 139.392  | 139.622      |
| BeO               | 102.783                                      | 104.976 | 105.690 | 106.004     | 104.589  | 106.722  | 107.439  | 107.759      |
| BeF               | 134.746                                      | 135.983 | 136.431 | 136.621     | 136.192  | 137.212  | 137.640  | 137.832      |
| Na <sub>2</sub>   | 16.670                                       | 16.777  | 16.786  | 16.787      | 17.079   | 17.248   | 17.334   | 17.394       |
| NaF               | 112.714                                      | 114.093 | 114.588 | 114.828     | 113.510  | 114.553  | 115.112  | 115.381      |
| MgO               | 58.502                                       | 61.089  | 61.707  | 62.000      | 58.894   | 61.269   | 61.815   | 62.092       |
| MgF               | 106.390                                      | 107.917 | 108.471 | 108.710     | 105.869  | 107.039  | 107.540  | 107.756      |
| BeH <sub>2</sub>  | 146.232                                      | 146.904 | 147.066 | 147.121     | 146.906  | 147.881  | 148.025  | 148.073      |
| BeF <sub>2</sub>  | 303.732                                      | 306.065 | 306.886 | 307.249     | 306.579  | 308.208  | 308.983  | 309.344      |
| MgH <sub>2</sub>  | 105.206                                      | 105.883 | 106.049 | 106.093     | 103.786  | 104.817  | 104.975  | 105.031      |
| MgF <sub>2</sub>  | 247.094                                      | 249.834 | 250.830 | 251.266     | 246.937  | 248.935  | 249.872  | 250.297      |
| Li <sub>2</sub> O | 168.762                                      | 171.476 | 172.270 | 172.663     | 171.655  | 174.400  | 175.259  | 175.686      |
| Na <sub>2</sub> O | 112.071                                      | 115.075 | 115.914 | 116.323     | 113.334  | 116.358  | 117.318  | 117.804      |
| LiOH              | 208.753                                      | 210.941 | 211.741 | 212.112     | 210.578  | 212.536  | 213.328  | 213.700      |
| NaOH              | 184.906                                      | 187.127 | 187.989 | 188.383     | 185.246  | 187.203  | 188.054  | 188.458      |

cc-pVDZ-F12 orbital basis sets in MOLPRO format

```
s,Li,0.59880000E+04,0.89890000E+03,0.20590000E+03,0.59240000E+02,0.19870000E+02,0.74060000E+01,
0.29300000E+01,0.11890000E+01,0.47980000E+00,0.75090000E-01,0.28320000E-01,0.0076
c,1.11,0.13300000E-03,0.10250000E-02,0.52720000E-02,0.20929000E-01,0.66340000E-01,
0.16577500E+00,0.31503800E+00,0.39352300E+00,0.19087000E+00,0.5414000E-02,-0.13280000E-02
c,1.11,-0.21000000E-04,-0.16100000E-03,-0.82000000E-03,-0.33260000E-02,-0.10519000E-01,-0.28097000E-01,
-0.55936000E-01,-0.99237000E-01,-0.11218900E+00,0.56788900E+00,0.53038200E+00
c,10.10,1
c,11.11,1
c,12.12,1
p,Li,0.32660000E+01,0.65110000E+00,0.16960000E+00,0.55780000E-01,0.20500000E-01,0.0091
c,1.5,0.86300000E-02,0.47538000E-01,0.20977200E+00,0.52852200E+00,0.38274400E+00
c,3.3,1
c,4.4,1
c,5.5,1
c,6.6,1
d,Li,0.148438,0.068473

s,Be,6863,1030,234.7,66.56,21.69,7.734,2.916,1.13,.2577,.1101,.04409,0.0147
c,1.11,.000236,.0018264478,.0094516046,.037956905,.11996483,.28216178,.42740399,.266278,.018193015,
-.0072751949,0.0019032814
c,1.11,-.000043,-.000333,-.001736,-.007012,-.023126,-.058138,-.114556,-.135908,.228026,.577441,.317873
c,9.9,1
c,11.11,1
c,12.12,1
p,Be,7.436,1.577,.4352,.1438,.04994,0.0093
c,1.5,.010736,.062854,.24818,.523699,.353425
c,3.3,1
c,4.4,1
c,5.5,1
c,6.6,1
d,Be,0.299284,0.125050

s,Na,.42300000E+06,.63340000E+05,.14410000E+05,.40770000E+04,.13280000E+04,.47860000E+03,.18620000E+03,.769
20000E+02,.33320000E+02,.15000000E+02,.68690000E+01,.26830000E+01,.11090000E+01,.45400000E+00,
.60150000E-01,.23820000E-01,0.0067
c,1.16,.18061800E-04,.14043000E-03,.73843800E-03,.31118200E-02,.11208100E-01,.35282800E-01,
```

.95989700E-01, .21373500E+00, .34868800E+00, .32456600E+00, .11263300E+00, .70679700E-02, .59801000E-03,  
.20413000E-03, -.53087000E-05, .18260500E-05  
c, 1.16, -.44065300E-05, -.34344300E-04, -.18011400E-03, -.76390000E-03, -.27524800E-02, -.88601600E-02,  
-.24793900E-01, -.60599500E-01, -.11644600E+00, -.16243700E+00, -.43889100E-01,  
.33791700E+00, .56134700E+00, .24524000E+00, .40675400E-02, -.12674600E-02  
c, 1.16, .66301900E-06, .51576900E-05, .27125000E-04, .11463500E-03, .41511800E-03, .13297800E-02,  
.37559500E-02, .91402500E-02, .17985900E-01, .25147700E-01, .76352200E-02, -.61458900E-01, -.11572100E+00,  
-.15890600E+00, .62640600E+00, .47540200E+00  
c, 14.14, 1  
c, 16.16, 1  
c, 17.17, 1  
p, Na, .24330000E+03, .57390000E+02, .18100000E+02, .65750000E+01, .25210000E+01, .96070000E+00, .35120000E+00,  
.98270000E-01, .37340000E-01, .15000000E-01, 0.0060  
c, 1.10, .22439200E-02, .17399700E-01, .77412500E-01,  
.21910200E+00, .37852200E+00, .39490200E+00, .16042400E+00, .23331100E-02, .19953600E-02, -.77734400E-03  
c, 1.10, -.22240100E-03, -.17427700E-02, -.77545600E-02, -.22518700E-01, -.38433000E-01, -.45017700E-01,  
-.19213200E-01, .18269700E+00, .55789700E+00, .37302200E+00  
c, 10.10, 1  
c, 11.11, 1  
p, Na, 3.33428581, 0.08836183  
d, Na, 0.896311, 0.110745, 0.056176  
  
s, Mg, .16490000E+06, .24710000E+05, .56280000E+04, .15960000E+04, .52100000E+03, .18800000E+03, .73010000E+02,  
.29900000E+02, .12540000E+02, .43060000E+01, .18260000E+01, .74170000E+00, .14570000E+00,  
.76120000E-01, .33100000E-01, 0.0120  
c, 1.15, .72992852E-04, .56665208E-03, .29626934E-02, .12296244E-01, .42732390E-01, .12301339E+00,  
.27483212E+00, .40181847E+00, .26469734E+00, .33261243E-01, -.44133529E-02, .20602406E-02,  
-.83847033E-03, .70819497E-03, -.20060176E-03  
c, 1.15, -.18424833E-04, -.14350020E-03, -.74871024E-03, -.31440747E-02, -.11048121E-01, -.33605846E-01,  
-.82594554E-01, -.15931351E+00, -.15288784E+00, .19084949E+00, .57996406E+00, .37202938E+00, .21169123E-01,  
-.11934365E-01, .27732867E-02  
c, 1.15, .35517561E-05, .27642017E-04, .14440388E-03, .60574423E-03, .21352674E-02, .64993445E-02,  
.16144594E-01, .31576557E-01, .31637441E-01, -.43914029E-01, -.15109333E+00, -.21766839E+00,  
.25980682E+00, .54724537E+00, .32590951E+00  
c, 13.13, 1  
c, 15.15, 1  
c, 16.16, 1  
p, Mg, .31690000E+03, .74860000E+02, .23720000E+02, .86690000E+01, .33630000E+01, .13100000E+01, .49110000E+00,  
.23640000E+00, .87330000E-01, .32370000E-01, 0.0090



c,1.10,.20753175E-02,.16286888E-01,.73869726E-01,.21429700E+00,.38215378E+00,.39817821E+00,.15287777E+00,  
-.43753955E-02,.62958244E-02,-.15676869E-02  
c,1.10,-.32972687E-03,-.25875416E-02,-.11912032E-01,-.35022673E-01,-.63996825E-01,-.70443568E-01,  
-.37583553E-01,.17704345E+00,.56670743E+00,.39614295E+00  
c,10.10,1  
c,11.11,1  
p,Mg,3.182039,0.171848  
d,Mg,1.431308,0.199432,0.090937

cc-pVTZ-F12 orbital basis sets in MOLPRO format

```
s,Li,0.66010000E+04,0.98970000E+03,0.22570000E+03,0.64290000E+02,0.21180000E+02,0.77240000E+01,  
0.30030000E+01,0.12120000E+01,0.49300000E+00,0.95150000E-01,0.47910000E-01,0.22200000E-01,0.0064  
c,1.12,0.11700000E-03,0.91100000E-03,0.47280000E-02,0.19197000E-01,0.63047000E-01,  
0.16320800E+00,0.31482700E+00,0.39393600E+00,0.19691800E+00,0.99970000E-02,-0.54020000E-02,0.17040000E-02  
c,1.12,-0.18000000E-04,-0.14200000E-03,-0.74100000E-03,-0.30200000E-02,-0.10123000E-01,-0.27094000E-01,  
-0.57359000E-01,-0.93895000E-01,-0.12109100E+00,0.27660800E+00,0.54954800E+00,0.27738500E+00  
c,10.10,1  
c,11.11,1  
c,12.12,1  
c,13.13,1  
p,Li,0.62500000E+01,0.13700000E+01,0.36720000E+00,0.11920000E+00,0.44740000E-01,0.17950000E-01,0.0075  
c,1.6,0.33880000E-02,0.19316000E-01,0.79104000E-01,0.27409500E+00,0.51948800E+00,0.28442300E+00  
c,3.3,1  
c,4.4,1  
c,5.5,1  
c,6.6,1  
c,7.7,1  
d,Li,0.235118,0.119404,0.060639  
f,Li,0.163775,0.075910  
  
s,Be,.14630000E+05,.21910000E+04,.49820000E+03,.14090000E+03,.45860000E+02,.16470000E+02,.63190000E+01,  
.25350000E+01,.10350000E+01,.25280000E+00,.10520000E+00,.42610000E-01,0.0141  
c,1.12,.91806606E-04,.71342800E-03,.37346072E-02,.15468005E-01,.52873737E-01,  
.14569439E+00,.30268071E+00,.40493577E+00,.22238740E+00,.12912029E-01,-.46478855E-02,.12281708E-02  
c,1.12,-.16701238E-04,-.13045864E-03,-.67947283E-03,-.28571410E-02,-.98127014E-02,-.28609231E-01,  
-.63760000E-01,-.11723138E+00,-.12120227E+00,.25322864E+00,.58183718E+00,.29195422E+00  
c,10.10,1  
c,11.11,1  
c,12.12,1  
c,13.13,1  
p,Be,.14030000E+02,.31680000E+01,.90240000E+00,.30360000E+00,.11300000E+00,.42860000E-01,0.0084  
c,1.6,.40993290E-02,.25626424E-01,.10376777E+00,.31154736E+00,.49812835E+00,.25887570E+00  
c,3.3,1  
c,4.4,1  
c,5.5,1  
c,6.6,1
```

c,7.7,1

d,Be,0.467046,0.220597,0.104194

f,Be,0.316640,0.145788

s,Na,.12240000E+07,.18320000E+06,.41700000E+05,.11810000E+05,.38530000E+04,.13910000E+04,.54250000E+03,  
.22490000E+03,.97930000E+02,.44310000E+02,.20650000E+02,.97290000E+01,.42280000E+01,.19690000E+01,  
.88900000E+00,.39640000E+00,.69930000E-01,.32890000E-01,.16120000E-01,0.0050

c,1.19,.47889400E-05,.37239500E-04,.19583100E-03,.82669800E-03,.30025100E-02,.97031000E-02,  
.28233700E-01,.73205800E-01,.16289700E+00,.28870800E+00,.34682900E+00,.20686500E+00,.32800900E-01,  
-.64773600E-03,.14587800E-02,-.17834600E-03,.91478900E-04,-.82518200E-04,.29225200E-04

c,1.19,-.11695800E-05,-.90911000E-05,-.47849900E-04,-.20196200E-03,-.73583700E-03,-.23874600E-02,  
-.70496900E-02,-.18785600E-01,-.44615300E-01,-.89774100E-01,-.14294000E+00,-.12431500E+00,  
.99964800E-01,.41708000E+00,.47512300E+00,.16326800E+00,.30954300E-02,-.15526300E-02,.55776300E-03

c,1.19,.17587100E-06,.13659400E-05,.71979500E-05,.30334900E-04,.11075200E-03,.35859600E-03,  
.10627200E-02,.28268700E-02,.67674200E-02,.13648000E-01,.22281400E-01,.19601100E-01,-.16770800E-01,  
-.77373400E-01,-.11350100E+00,-.13913000E+00,.44008300E+00,.53895200E+00,.13388900E+00

c,17.17,1

c,18.18,1

c,19.19,1

c,20.20,1

p,Na,.41340000E+03,.97980000E+02,.31370000E+02,.11620000E+02,.46710000E+01,.19180000E+01,.77750000E+00,  
.30130000E+00,.22750000E+00,.75270000E-01,.31260000E-01,.13420000E-01,0.0072

c,1.12,.90819600E-03,.74177300E-02,.35746400E-01,.11852000E+00,.26140300E+00,.37839500E+00,  
.33463200E+00,.12684400E+00,-.14711700E-01,.56865000E-02,-.17097400E-02,.54714200E-03

c,1.12,-.90174100E-04,-.73934200E-03,-.35730900E-02,-.12014200E-01,-.26717800E-01,-.39275300E-01,  
-.37608300E-01,-.43322800E-01,.51800300E-01,.26019400E+00,.54968100E+00,.28187200E+00

c,10.10,1

c,11.11,1

c,12.12,1

c,13.13,1

p,Na,0.796814

d,Na,1.145665

d,Na,0.051789,0.091634,0.162136

f,Na,0.134197,0.069524

s,Mg,.32760000E+06,.49050000E+05,.11150000E+05,.31520000E+04,.10250000E+04,.36880000E+03,.14320000E+03,  
.58960000E+02,.25400000E+02,.11150000E+02,.40040000E+01,.17010000E+01,.70600000E+00,.14100000E+00,  
.68080000E-01,.30630000E-01,0.0109

c,1.16,.30960809E-04,.24095411E-03,.12666017E-02,.53335908E-02,.19077024E-01,.58805754E-01,  
.15145366E+00,.30071600E+00,.38114885E+00,.21358376E+00,.23121033E-01,-.23075697E-02,.12889998E-02,  
-.42638745E-03,.35432021E-03,-.11258778E-03  
c,1.16,-.78317328E-05,-.60793506E-04,-.32119671E-03,-.13495523E-02,-.49057028E-02,-.15356145E-01,  
-.42340895E-01,-.94060347E-01,-.16342527E+00,-.12475430E+00,.23562334E+00,.57756255E+00,  
.33523236E+00,.15633813E-01,-.83779924E-02,.22305631E-02  
c,1.16,.15090770E-05,.11713361E-04,.61898027E-04,.26008758E-03,.94621789E-03,.29659518E-02,  
.82124464E-02,.18397739E-01,.32665723E-01,.25731486E-01,-.53535071E-01,-.15689492E+00,-.20665872E+00,  
.32429847E+00,.55261115E+00,.26035173E+00  
c,14.14,1  
c,15.15,1  
c,16.16,1  
c,17.17,1  
p,Mg,.53960000E+03,.12790000E+03,.41020000E+02,.15250000E+02,.61660000E+01,.25610000E+01,.10600000E+01,  
.41760000E+00,.26900000E+00,.12230000E+00,.54760000E-01,.23880000E-01,0.0081  
c,1.12,.83396886E-03,.68921519E-02,.33787368E-01,.11440056E+00,.25951391E+00,.38509477E+00,  
.33537254E+00,.11064124E+00,-.12131497E-01,.70056199E-02,-.15133527E-02,.44892460E-03  
c,1.12,-.13207580E-03,-.10953792E-02,-.53949542E-02,-.18557230E-01,-.42737490E-01,-.64768429E-01,  
-.62781782E-01,-.24491228E-01,.10476111E+00,.35890875E+00,.49250052E+00,.18528024E+00  
c,10.10,1  
c,11.11,1  
c,12.12,1  
c,13.13,1  
p,Mg,2.812615  
d,Mg,1.837506,0.288307,0.151085,0.077449  
f,Mg,0.225791,0.109140

cc-pVQZ-F12 orbital basis sets in MOLPRO format

```
s,Li,29493.0,4417.10,1005.22,284.701,92.8654,33.5118,13.0418,5.35754,2.27934,0.993990,0.433471,0.095566,
0.044657,0.020633,0.0061
c,1.14,0.000018,0.000141,0.000739,0.003107,0.011135,0.034670,0.092171,0.199576,0.328836,0.345976,0.142761,
0.005319,-0.002101,0.000815
c,1.14,-0.000003,-0.000022,-0.000115,-0.000487,-0.001746,-0.005520,-0.014928,-0.034207,-0.062156,-0.095904,
-0.103974,0.307166,0.579033,0.223211
c,11.11,1
c,12.12,1
c,13.13,1
c,14.14,1
c,15.15,1
p,Li,19.6635,4.62311,1.41378,0.473721,0.176151,0.072675,0.032141,0.014556,0.0065
c,1.8,0.000540,0.003865,0.015171,0.049204,0.154661,0.360095,0.441852,0.156000
c,4.4,1
c,5.5,1
c,6.6,1
c,7.7,1
c,8.8,1
c,9.9,1
d,Li,0.326357,0.177836,0.096905,0.052804
f,Li,0.207628,0.121194,0.070742
g,Li,0.196134,0.108733

s,Be,.54620000E+05,.81800000E+04,.18620000E+04,.52730000E+03,.17200000E+03,.62100000E+02,.24210000E+02,
.99930000E+01,.43050000E+01,.19210000E+01,.86630000E+00,.24750000E+00,.10090000E+00,.41290000E-01,0.0128
c,1.14,.17710340E-04,.13760197E-03,.72299900E-03,.30388057E-02,.10908403E-01,.34035077E-01,
.91192587E-01,.19926775E+00,.32935508E+00,.34048879E+00,.14373990E+00,.65168111E-02,-.18647716E-02,
.47991942E-03
c,1.14,-.32215111E-05,-.25153448E-04,-.13130846E-03,-.55790538E-03,-.19884660E-02,-.63703189E-02,
-.17217416E-01,-.40858269E-01,-.74237431E-01,-.11923373E+00,-.87776953E-01,.27878824E+00,
.58349869E+00,.26900674E+00
c,11.11,1
c,12.12,1
c,13.13,1
c,14.14,1
c,15.15,1
```

p,Be,.43750000E+02,.10330000E+02,.32260000E+01,.11270000E+01,.43340000E+00,.18080000E+00,.78270000E-01,  
.33720000E-01,0.0076  
c,1.8,.63343171E-03,.48081655E-02,.20527371E-01,.67816498E-01,.19286754E+00,.37869226E+00,.40057389E+00,  
.13806744E+00  
c,4.4,1  
c,5.5,1  
c,6.6,1  
c,7.7,1  
c,8.8,1  
c,9.9,1  
d,Be,1.026822,0.483892,0.228035,0.107462  
f,Be,0.438694,0.230223,0.120820  
g,Be,0.343616,0.167359  
  
s,Na,2185572,327228.4,74466.84,21093.15,6881.898,2484.696,969.2232,402.0643,175.3545,79.65199,37.38672,  
18.00194,8.724371,3.857715,1.815686,0.838254,0.381935,0.071679,0.033916,0.016525,0.0051  
c,1.20,0.000002,0.000018,0.000095,0.000401,0.001459,0.004746,0.014031,0.037733,0.090702,0.186466,0.301837,  
0.323830,0.168700,0.023083,-0.000147,0.001099,-0.000101,0.000061,-0.000053,0.000018  
c,1.20,-0.000001,-0.000004,-0.000023,-0.000098,-0.000357,-0.001165,-0.003464,-0.009495,-0.023587,-0.052394,  
-0.098028,-0.143673,-0.102298,0.138029,0.429006,0.447813,0.144543,0.002617,-0.001192,0.000440  
c,1.20,0.000000,0.000001,0.000003,0.000015,0.000054,0.000175,0.000520,0.001431,0.003554,0.007954,0.014955,  
0.022472,0.016205,-0.023550,-0.080120,-0.112921,-0.132989,0.417516,0.549443,0.148110  
c,17.17,1  
c,18.18,1  
c,19.19,1  
c,20.20,1  
c,21.21,1  
p,Na,1119.578,265.3239,85.99553,32.53759,13.51565,5.966856,2.700045,1.218512,0.542187,0.227413,0.133040,  
0.057577,0.025971,0.011901,0.0055  
c,1.14,0.000162,0.001408,0.007586,0.029615,0.088477,0.195519,0.306621,0.341242,0.229690,0.054921,-0.003441,  
0.002340,-0.000662,0.000199  
c,1.14,-0.000016,-0.000140,-0.000754,-0.002968,-0.008919,-0.020029,-0.031380,-0.036489,-0.029625,-0.010146,  
0.082128,0.334553,0.508142,0.196636  
c,10.10,1  
c,11.11,1  
c,12.12,1  
c,13.13,1  
c,14.14,1  
c,15.15,1

d,Na,1.522314  
d,Na,0.235314,0.136141,0.078764,0.045569  
f,Na,0.181127,0.109200,0.065836  
g,Na,0.157858,0.091607

s,Mg,.29680000E+07,.44430000E+06,.10110000E+06,.28640000E+05,.93430000E+04,.33730000E+04,.13160000E+04,  
.54580000E+03,.23810000E+03,.10820000E+03,.50800000E+02,.24480000E+02,.11930000E+02,.55430000E+01,  
.26750000E+01,.12630000E+01,.58830000E+00,.14960000E+00,.67000000E-01,.29520000E-01,0.0108  
c,1.20,.19717729E-05,.15336187E-04,.80685186E-04,.34077130E-03,.12419366E-02,.40412371E-02,  
.11979690E-01,.32425251E-01,.78933243E-01,.16657542E+00,.28287101E+00,.33188993E+00,  
.20328704E+00,.38289740E-01,.30891571E-03,.13890739E-02,-.13615909E-03,.85532166E-04,-.56910200E-04,  
.17725931E-04  
c,1.20,-.49816008E-06,-.38756303E-05,-.20385410E-04,-.86165921E-04,-.31417603E-03,-.10257663E-02,  
-.30581568E-02,-.84106280E-02,-.21120161E-01,-.47688198E-01,-.92411942E-01,-.14254794E+00,  
-.12616761E+00,.71528228E-01,.38303878E+00,.49013333E+00,.20438050E+00,.70223118E-02,  
-.26787413E-02,.69368983E-03  
c,1.20,.96017472E-07,.74616390E-06,.39311860E-05,.16581175E-04,.60625713E-04,.19732216E-03,.59088089E-03,  
.16190379E-02,.40975627E-02,.92298919E-02,.18216806E-01,.28288360E-01,.26505867E-01,-.17205272E-01,  
-.88591709E-01,-.16387148E+00,-.15950640E+00,.32171495E+00,.59137316E+00,.23686576E+00  
c,17.17,1  
c,18.18,1  
c,19.19,1  
c,20.20,1  
c,21.21,1  
p,Mg,.14410000E+04,.34140000E+03,.11070000E+03,.41970000E+02,.17490000E+02,.77530000E+01,.35340000E+01,  
.16140000E+01,.72990000E+00,.30290000E+00,.15830000E+00,.81900000E-01,.41230000E-01,.19880000E-01,0.0071  
c,1.14,.15240713E-03,.13276371E-02,.72193728E-02,.28520477E-01,.86534603E-01,.19494957E+00,  
.31205125E+00,.34847626E+00,.21888589E+00,.43557946E-01,-.37374701E-02,.30512299E-02,-.86692173E-03,  
.23051656E-03  
c,1.14,-.24103074E-04,-.21080852E-03,-.11452963E-02,-.45641674E-02,-.13960337E-01,-.32110509E-01,  
-.51621713E-01,-.61371346E-01,-.44246480E-01,.52319091E-01,.22169161E+00,.39525503E+00,  
.36407820E+00,.97795238E-01  
c,10.10,1  
c,11.11,1  
c,12.12,1  
c,13.13,1  
c,14.14,1  
c,15.15,1  
d,Mg,2.043044,0.356152,0.204072,0.116932,0.067001

f,Mg,0.332321,0.178223,0.094316  
g,Mg,0.267541,0.134147



cc-pVDZ-F12 orbital basis sets in MOLPRO format

spd,Li,cc-pVDZ-F12;c  
s,Li,1.442737  
p,Li,0.703963

spd,Be,cc-pVDZ-F12;c  
s,Be,1.868915  
p,Be,1.577635

spd,Na,cc-pVDZ-F12;c  
s,Na,3.798746  
p,Na,0.744795  
d,Na,4.715702

spd,Mg,cc-pVDZ-F12;c  
s,Mg,3.721568  
p,Mg,0.927962  
d,Mg,6.571650

cc-pCVTZ-F12 orbital basis sets in MOLPRO format

```
spdf,Li,cc-pVTZ-F12;c  
s,Li,0.406129  
p,Li,1.375260  
d,Li,4.518674
```

```
spdf,Be,cc-pVTZ-F12;c  
s,Be,1.165772  
p,Be,3.102503  
d,Be,5.991579
```

```
spdf,Na,cc-pVTZ-F12;c  
s,Na,3.764945  
p,Na,3.051100  
d,Na,5.420585  
f,Na,4.557524
```

```
spdf,Mg,cc-pVTZ-F12;c  
s,Mg,5.425948  
p,Mg,0.937022  
d,Mg,7.668928  
f,Mg,5.520473
```

cc-pCVQZ-F12 orbital basis sets in MOLPRO format

```
spdfg,Li,cc-pVQZ-F12;c  
s,Li,1.080878  
p,Li,1.578306  
d,Li,5.188378
```

```
spdfg,Be,cc-pVQZ-F12;c  
s,Be,2.105181  
p,Be,3.460177  
d,Be,7.629658
```

```
spdfg,Na,cc-pVQZ-F12;c  
s,Na,4.713446  
p,Na,2.910439  
d,Na,6.466863  
f,Na,4.635851
```

```
spdfg,Mg,cc-pVQZ-F12;c  
s,Mg,6.628966  
p,Mg,4.013581  
d,Mg,8.402766  
f,Mg,5.703089
```

cc-pVDZ-F12/OptRI ABS in MOLPRO format

s,He,6.186444,2.105197,0.444703,0.139255  
p,He,15.6885,3.55190,1.73889,0.593703  
d,He,3.70761,0.810428

s,Li,0.35371261,0.21258866,0.05747471,0.02102723  
p,Li,0.39971706,0.10751005,0.03793473,0.01409188  
d,Li,0.56424368,0.21190397,0.09176883,0.03499148  
f,Li,0.55389765,0.29557321,0.08517342  
g,Li,0.26901921

s,Be,0.87797,0.45954,0.11436,0.02915  
p,Be,0.97459,0.29016,0.09412,0.0323  
d,Be,0.87952,0.47411,0.19898,0.08909738  
f,Be,1.19524565,0.35010419,0.08898933  
g,Be,0.56096384

s,Na,2.93474100,0.348607,0.092676,0.011855  
p,Na,10.891993,1.200796,0.333449,0.068619,0.011507  
d,Na,5.53154400,0.315764,0.144577,0.084987  
f,Na,0.71103335,0.26536755,0.04613484  
g,Na,2.38269605

s,Mg,3.503953,0.22886,0.058604,0.025465  
p,Mg,7.221093,1.504399,0.47977,0.12880066,0.047697  
d,Mg,5.746645,0.887913,0.59714,0.133535  
f,Mg,0.93180207,0.59297896,0.23387784  
g,Mg,0.26609700

cc-pVTZ-F12/OptRI ABS in MOLPRO format

s,He,6.46673,1.07625,0.358309,0.122283  
p,He,11.9956,2.42546,0.734471  
d,He,3.17199,1.10760,0.354700  
f,He,1.92985,1.11619

s,Li,0.28448946,0.06519006,0.0305793,0.00996085  
p,Li,0.79841894,0.24203593,0.06768423,0.02963571  
d,Li,0.73694207,0.16729184,0.08472805,0.03983372  
f,Li,0.79255996,0.22195881,0.12565437  
g,Li,0.62433431,0.29648783

s,Be,1.03892532,0.19312791,0.07216840,0.05547194  
p,Be,3.84589935,0.53985952,0.14717917,0.05582622  
d,Be,2.46453001,0.35877444,0.13998339,0.07443736  
f,Be,1.06630670,0.44277460,0.18965962  
g,Be,0.62933243,0.28068029

s,Na,0.30232914,0.22602908,0.04964697,0.01142339  
p,Na,3.94497270,0.25779989,0.04569074,0.01977456  
d,Na,5.67482245,0.43983751,0.31588449,0.06740995  
f,Na,0.49936339,0.31530505,0.09688784  
g,Na,0.77760598,0.47393510

s,Mg,0.48655988,0.10847663,0.05235468,0.02354632  
p,Mg,6.31735570,0.42386468,0.0939448,0.03107846  
d,Mg,3.00269477,0.60919319,0.37947308,0.10102759  
f,Mg,1.25890086,0.29360684,0.14189589  
g,Mg,0.38133207,0.19731969

cc-pVQZ-F12/OptRI ABS in MOLPRO format

s,He,12.5145,1.85801,0.670937,0.268516  
p,He,30.2470,4.34894,1.84113  
d,He,5.21187,1.93819,0.639057  
f,He,3.06375,1.67869  
g,He,2.94822

s,Li,0.84519851,0.24887901,0.06464998,0.03016188  
p,Li,1.08575419,0.22978344,0.10959524,0.04437389  
d,Li,2.50692559,1.21899641,0.63754339,0.06943147  
f,Li,0.68218478,0.26987366,0.05436959  
g,Li,0.78957590,0.25481984  
h,Li,0.21463543

s,Be,1.15384757,0.67898278,0.14646294,0.07596445  
p,Be,2.67896661,0.86635933,0.33204328,0.13711404  
d,Be,3.38315011,0.63133869,0.35848633,0.15290382  
f,Be,1.56610939,0.85807551,0.31250307  
g,Be,0.44687380,0.21803548  
h,Be,0.47374815

s,Na,0.97079353,0.26422634,0.05450489,0.02601365  
p,Na,0.97883998,0.40017231,0.17458329,0.07713661  
d,Na,6.81892927,1.16461100,0.74720294,0.17791867  
f,Na,0.76563613,0.23631495,0.14063583  
g,Na,0.26806985,0.20567749  
h,Na,0.09191597

s,Mg,1.3130881,0.26079421,0.10029064,0.04875049  
p,Mg,1.02459291,0.23225820,0.12188311,0.06297149  
d,Mg,3.99886625,1.19738080,0.27279992,0.15272362  
f,Mg,1.63724142,0.69313136,0.23268902  
g,Mg,0.66770449,0.51247490  
h,Mg,0.11896904

cc-pCVDZ-F12/OptRI ABS in MOLPRO format

s,Li,15.17509777,2.27629359,0.36122030,0.21258866,0.05747471,0.02102723  
p,Li,18.83282215,3.16937973,1.62567022,0.32022453,0.10751005,0.03793473,0.01409188  
d,Li,1.42956539,0.56424368,0.21190397,0.09176883,0.03499148  
f,Li,0.55389765,0.29557321,0.08517342  
g,Li,0.26901921

s,Be,12.72683786,3.00400402,0.74518076,0.45954,0.11436,0.02915  
p,Be,33.48724006,7.42180522,4.63790195,0.86568855,0.29016,0.09412,0.0323  
d,Be,1.99027344,0.87952,0.47411,0.19898,0.08909738  
f,Be,1.19524565,0.35010419,0.08898933  
g,Be,0.56096384

s,Na,34.30210547,12.82336807,4.97588207,1.04024312,0.76453926,0.348607,0.092676,0.011855  
p,Na,15.20670292,11.58758513,8.41498519,1.51726751,0.30447611,0.068619,0.011507  
d,Na,35.97947856,10.80171902,2.12444147,0.63777087,0.32037310,0.084987  
f,Na,35.74001867,7.51248426,3.03871525,1.18202346,0.26536755,0.04613484  
g,Na,6.30941629,2.38269605

s,Mg,54.86887548,17.09236737,6.40692437,1.34457192,0.57504981,0.22886,0.058604,0.025465  
p,Mg,38.20161635,13.65211573,7.05255652,1.42906790,0.37710262,0.12880066,0.047697  
d,Mg,44.43808838,15.16838205,3.06126512,0.53136456,0.40033273,0.133535  
f,Mg,17.14057121,6.91802228,2.52889276,0.89946896,0.59297896,0.23387784  
g,Mg,4.52380786,0.26609700

cc-pCVTZ-F12/OptRI ABS in MOLPRO format

s,Li,5.32014174,3.96841097,1.15425036,0.31568586,0.06519006,0.0305793  
p,Li,65.17647685,2.36876713,0.58798837,0.24203593,0.06768423,0.02963571  
d,Li,5.86681409,0.72347264,0.16729184,0.08472805,0.03983372  
f,Li,3.49747761,2.57794849,0.22195881,0.12565437  
g,Li,0.62433431,0.29648783

s,Be,31.35437071,8.37636961,0.81749892,0.19312791,0.07216840,0.05547194  
p,Be,71.68891568,10.03357832,1.76491449,0.53985952,0.14717917,0.05582622  
d,Be,9.61013957,1.75138118,0.35877444,0.13998339,0.07443736  
f,Be,2.09951868,1.53193277,0.44277460,0.18965962  
g,Be,0.62933243,0.28068029

s,Na,10.34651204,1.09208073,0.82293668,0.60005545,0.22602908,0.04964697,0.01142339  
p,Na,8.19971,1.11017610,0.61342526,0.15729554,0.04569074,0.01977456  
d,Na,16.32108597,2.47106841,0.88096037,0.67720946,0.31588449,0.06740995  
f,Na,11.87934669,1.88789559,0.85836930,0.31530505,0.09688784  
g,Na,3.72805218,0.77760598,0.47393510

s,Mg,12.23975120,4.05859139,1.42346407,0.46634904,0.10847663,0.05235468,0.02354632  
p,Mg,17.00676947,6.47534381,1.40743655,0.72059461,0.0939448,0.03107846  
d,Mg,28.95152928,5.92033595,4.56563664,1.32762278,0.37947308,0.10102759  
f,Mg,16.97918436,4.31399963,2.12534930,0.29360684,0.14189589  
g,Mg,5.66143987,0.38133207,0.19731969



cc-pCVQZ-F12/OptRI ABS in MOLPRO format

s,Li,13.99818948,2.55610184,0.82807401,0.24887901,0.06464998,0.03016188  
p,Li,12.27756279,3.30764088,0.61803345,0.22978344,0.10959524,0.04437389  
d,Li,4.02331426,1.21899641,0.63754339,0.06943147  
f,Li,0.94543889,0.26987366,0.05436959  
g,Li,1.51089334,0.25481984  
h,Li,0.21463543

s,Be,35.58861903,3.52952138,1.13475333,0.67898278,0.14646294,0.07596445  
p,Be,38.75661649,6.47779650,1.46297636,0.86635933,0.33204328,0.13711404  
d,Be,3.48665882,0.63133869,0.35848633,0.15290382  
f,Be,1.55648295,0.85807551,0.31250307  
g,Be,3.83096273,0.44505326  
h,Be,0.47374815

s,Na,21.89139508,8.62918230,2.29687162,1.51907687,0.26422634,0.05450489,0.02601365  
p,Na,19.19965756,8.77309033,4.66171400,1.43686896,0.40017231,0.17458329,0.07713661  
d,Na,23.74159152,11.21798805,2.86290934,1.16826853,0.74720294,0.17791867  
f,Na,12.35435289,1.93342144,0.82925753,0.23631495,0.14063583  
g,Na,12.26457305,4.43840145,1.64733518,0.20567749  
h,Na,0.09191597

s,Mg,17.75246670,9.59932340,2.66522137,1.17902263,0.26079421,0.10029064,0.04875049  
p,Mg,21.51156564,8.70805433,2.41851317,0.62259234,0.23225820,0.12188311,0.06297149  
d,Mg,34.10600982,18.51880403,3.91486070,1.00574575,0.27279992,0.15272362  
f,Mg,12.62735470,7.34923153,1.76411397,0.69313136,0.23268902  
g,Mg,13.98315355,1.01056986,0.66657587,0.51247490  
h,Mg,0.11896904

cc-pV5Z/MP2FIT ABS in MOLPRO format

s,Na,400.873,74.4967,36.4625,10.7936,5.29936,1.93777,1.01712,0.414619,0.22435,0.136222,0.0806265,0.0473961  
p,Na,93.4239,25.3469,8.52195,3.87851,2.13627,1.02399,0.437132,0.223328,0.140095,0.0951487,0.0559091  
d,Na,32.4304,9.71975,3.46822,1.55938,0.540694,0.288717,0.170367,0.115665,0.0740876  
f,Na,5.41015,1.87207,0.920046,0.457874,0.285729,0.176785,0.105124  
g,Na,2.00507,0.833273,0.446755,0.245535,0.122323  
h,Na,1.09862,0.513689,0.260977  
i,Na,0.682035

aug-cc-pVDZ/MP2FIT ABS in MOLPRO format

s,Li,30.4075,7.58805,2.5668,0.787336,0.345354,0.160474,0.0923455,0.0130916  
p,Li,6.71598,2.33264,0.772809,0.183739,0.0783946,0.0200254  
d,Li,1.49284,0.575267,0.241521,0.142015,0.0888708  
f,Li,1.61775,0.361631,0.200382

s,Be,41.8746,8.51217,3.10685,1.0695,0.43143,0.213349,0.124175,0.060234  
p,Be,9.76007,2.64058,0.788905,0.316492,0.126019,0.0556308  
d,Be,2.31369,0.700086,0.353642,0.170008,0.114965  
f,Be,2.02219,0.452039,0.363516

s,Na,159.646,35.0886,9.68068,5.65459,1.83236,0.640241,0.329007,0.130603,0.0504624,0.0125190  
p,Na,51.3091,5.34079,1.72797,0.908608,0.410309,0.102451,0.0616833,0.0141438  
d,Na,16.944,4.70522,1.08925,0.528614,0.155416,0.0585937  
f,Na,2.31497,0.682956,0.27357,0.149747

s,Mg,200.427,44.0693,11.9447,6.90059,2.30732,0.79142,0.442013,0.194707,0.0832303,0.0400543  
p,Mg,59.6825,9.00677,3.761,1.17635,0.594066,0.210529,0.0895356,0.0367681  
d,Mg,22.3994,6.43683,1.18113,0.749498,0.259159,0.108646  
f,Mg,2.891,0.928774,0.326783,0.180059

aug-cc-pVTZ/MP2FIT ABS in MOLPRO format

s,Li,98.0209,20.4906,6.23005,1.97995,0.81248,0.302821,0.132817,0.0687151,0.0133628  
p,Li,9.98153,2.74212,0.995132,0.455449,0.190615,0.0859203,0.0232973  
d,Li,3.90895,0.950364,0.273703,0.148839,0.0746477,0.0641678  
f,Li,0.979494,0.362171,0.182526,0.0942062  
g,Li,0.300000,0.160856

s,Be,115.41,27.4201,8.95789,3.30036,1.07939,0.450645,0.186293,0.102049,0.0591756  
p,Be,12.9585,3.56324,1.15263,0.550086,0.2445,0.107562,0.0555035  
d,Be,5.02291,1.698,0.488912,0.265357,0.100698,0.072884  
f,Be,1.67053,0.452696,0.254672,0.150785  
g,Be,0.500000,0.339542

s,Na,262.945,59.3272,24.4106,10.3153,3.82467,1.21138,0.626025,0.231136,0.099616,0.0608538,0.0116721  
p,Na,45.9602,5.92673,2.44801,1.25173,0.555056,0.323653,0.131738,0.0679466,0.0192736  
d,Na,23.7262,7.20337,2.54853,0.965966,0.423426,0.250862,0.102838,0.0314073  
f,Na,3.71955,1.16754,0.529388,0.265125,0.146659,0.0877992  
g,Na,1.44688,0.514372,0.248868

s,Mg,247.482,82.3065,31.8882,12.3628,4.99341,1.70781,0.790449,0.275153,0.123443,0.0771233,0.0349975  
p,Mg,58.6402,7.1768,3.49873,1.51822,0.806848,0.326559,0.15472,0.0724774,0.0347277  
d,Mg,29.9212,9.11394,3.17149,1.48838,0.572001,0.392816,0.18472,0.0841238  
f,Mg,4.60912,1.54347,0.64499,0.334225,0.174575,0.110939  
g,Mg,1.76455,0.717219,0.291521

aug-cc-pVQZ/MP2FIT ABS in MOLPRO format

s,Li,109.055,20.8783,6.48699,1.9545,1.04023,0.429079,0.161718,0.0829282,0.0170155  
p,Li,17.5494,5.44422,1.87561,0.775204,0.371484,0.163201,0.076565,0.022329  
d,Li,6.80179,2.21726,1.0076,0.497801,0.202532,0.11806,0.0350788  
f,Li,2.78579,1.03442,0.532421,0.277415,0.11709,0.0724729  
g,Li,0.973573,0.413563,0.203462,0.137078  
h,Li,0.428565,0.167003

s,Be,136.646,28.3921,8.68918,3.7802,1.16278,0.430644,0.18601,0.0973907,0.0453197  
p,Be,22.2394,6.38157,2.5546,1.01598,0.444495,0.201832,0.0948127,0.0445393  
d,Be,8.49613,3.04272,1.18451,0.584073,0.278041,0.162619,0.0814135  
f,Be,3.40182,1.48135,0.623318,0.344031,0.140547,0.0727809  
g,Be,1.86007,0.53622,0.272843,0.148535  
h,Be,0.535704,0.3825

s,Na,214.738,48.6437,16.3062,9.60658,3.49236,1.31021,0.608485,0.352171,0.185033,0.0882043,0.0506201,  
0.0106701  
p,Na,67.8947,25.5016,6.26963,2.29751,1.32529,0.534763,0.280666,0.139646,0.0670942,0.0184038  
d,Na,29.3304,8.491,3.17181,1.40043,0.717681,0.407893,0.269587,0.121099,0.0316729  
f,Na,4.8028,2.1908,0.838895,0.358626,0.215661,0.117546,0.0600729  
g,Na,1.36508,0.578782,0.297583,0.0983548  
h,Na,0.648943,0.298253

s,Mg,265.858,65.1123,23.5047,11.5247,4.82385,1.95043,0.74041,0.429062,0.228177,0.126216,0.066462,0.0349955  
p,Mg,72.0405,45.366,6.73673,2.25791,1.14991,0.348795,0.208905,0.106035,0.0588464,0.0265578  
d,Mg,35.2442,10.9473,3.99744,2.10185,1.00886,0.467248,0.268153,0.155964,0.0685515  
f,Mg,5.8836,2.84658,1.31819,0.439446,0.25776,0.129503,0.0646084  
g,Mg,2.67583,1.09711,0.384743,0.18191  
h,Mg,1.0598,0.649696

aug-cc-pV5Z/MP2FIT ABS in MOLPRO format

s,Li,115.553,24.2286,7.79537,2.89136,1.42394,0.705917,0.380123,0.246901,0.123532,0.0642881,0.0122985  
p,Li,20.0939,6.08149,2.34726,1.02995,0.52019,0.223276,0.121261,0.0727775,0.0187707  
d,Li,6.96358,2.68153,1.35163,0.771893,0.339644,0.173452,0.101078,0.0296694  
f,Li,3.22949,1.34929,0.76464,0.415519,0.25928,0.156013,0.0497839  
g,Li,1.81964,0.856517,0.43491,0.196188,0.0843501  
h,Li,1.18528,0.598672,0.427119,0.146929  
i,Li,0.598672,0.253741

s,Be,155.476,33.6165,9.86575,5.18723,2.04825,0.941824,0.494373,0.304521,0.168188,0.0908364,0.0490966  
p,Be,29.2263,8.19087,3.2447,1.27464,0.594885,0.289372,0.148487,0.0785465,0.0425786  
d,Be,9.7761,3.81802,1.73383,0.897386,0.453927,0.238389,0.136955,0.0725133  
f,Be,4.09104,1.76139,0.874992,0.497082,0.330842,0.205294,0.138098  
g,Be,2.35614,0.727039,0.51533,0.380351,0.160344  
h,Be,1.50462,0.672211,0.511708,0.275472  
i,Be,0.672211,0.357670

s,Na,400.873,74.4967,36.4625,10.7936,5.29936,1.93777,1.01712,0.414619,0.22435,0.136222,0.0806265,0.0473961,  
0.00920948  
p,Na,93.4239,25.3469,8.52195,3.87851,2.13627,1.02399,0.437132,0.223328,0.140095,0.0951487,0.0559091,  
0.0148607  
d,Na,32.4304,9.71975,3.46822,1.55938,0.540694,0.288717,0.170367,0.115665,0.0740876,0.031284  
f,Na,5.41015,1.87207,0.920046,0.457874,0.285729,0.176785,0.105124,0.0490626  
g,Na,2.00507,0.833273,0.446755,0.245535,0.122323,0.100353  
h,Na,1.09862,0.513689,0.260977,0.125079  
i,Na,0.682035,0.248199

s,Mg,540.416,102.127,43.1114,13.4767,7.37556,2.6068,1.29897,0.584075,0.330108,0.180505,0.119148,0.0691447,  
0.0401233  
p,Mg,123.479,33.4832,12.3366,5.61338,2.42395,1.15789,0.531815,0.293408,0.194135,0.130156,0.0845925,0.054956  
d,Mg,28.3542,8.2488,2.95615,1.2873,0.58346,0.344419,0.22243,0.151929,0.09125,0.0548064  
f,Mg,6.95067,2.76214,1.25072,0.575997,0.334257,0.216355,0.12609,0.0734838  
g,Mg,2.5501,1.0726,0.552581,0.30805,0.146581,0.0697491  
h,Mg,1.51258,0.45792,0.292537,0.196604  
i,Mg,1.07457,0.769869

aug-cc-pwCVDZ/MP2FIT ABS in MOLPRO format

s,Li,99.9253,30.4075,14.9763,7.58805,3.98647,2.5668,0.787336,0.345354,0.160474,0.0923455,0.0130916  
p,Li,24.0101,6.71598,3.99706,2.33264,0.772809,0.183739,0.0783946,0.0200254  
d,Li,3.87398,1.49284,0.575267,0.241521,0.142015,0.0888708  
f,Li,1.61775,0.361631,0.200382

s,Be,142.716,41.8746,21.4043,8.51217,4.30354,3.10685,1.0695,0.43143,0.213349,0.124175,0.060234  
p,Be,35.6755,9.76007,4.21747,2.64058,0.788905,0.316492,0.126019,0.0556308  
d,Be,4.2173,2.31369,0.700086,0.353642,0.170008,0.114965  
f,Be,2.02219,0.452039,0.363516

s,Na,294.906,159.646,55.518,35.0886,15.3653,9.68068,5.65459,1.83236,0.640241,0.329007,0.130603,0.0504624,  
0.0125190  
p,Na,109.933,51.3091,18.6641,5.34079,3.13814,1.72797,0.908608,0.410309,0.102451,0.0616833,0.0141438  
d,Na,28.5633,16.944,8.94061,4.70522,2.08557,1.08925,0.528614,0.155416,0.0585937  
f,Na,6.12765,2.31497,1.17888,0.682956,0.27357,0.149747

s,Mg,406.591,200.427,100.478,44.0693,22.107,11.9447,6.90059,2.30732,0.79142,0.442013,0.194707,0.0832303,  
0.0400543  
p,Mg,127.033,59.6825,19.5551,9.00677,5.11369,3.761,1.17635,0.594066,0.210529,0.0895356,0.0367681  
d,Mg,31.8814,22.3994,10.2021,6.43683,2.43961,1.18113,0.749498,0.259159,0.108646  
f,Mg,7.40658,2.891,0.928774,0.601439,0.326783,0.180059

aug-cc-pwCVTZ/MP2FIT ABS in MOLPRO format

s,Li,224.500,98.0209,42.7996,20.4906,9.80609,6.23005,1.97995,1.32156,0.81248,0.302821,0.132817,0.0687151,  
0.0133628

p,Li,28.4029,9.98153,5.34928,2.74212,1.4928,0.995132,0.455449,0.190615,0.0859203,0.0232973

d,Li,8.86060,3.90895,1.71086,0.950364,0.273703,0.148839,0.0746477,0.0641678

f,Li,2.64905,0.979494,0.362171,0.182526,0.0942062

g,Li,0.300000,0.160856

s,Be,249.463,115.41,46.1748,27.4201,12.0268,8.95789,3.30036,1.74388,1.07939,0.450645,0.186293,0.102049,  
0.0591756

p,Be,33.2632,12.9585,6.65163,3.56324,2.10073,1.15263,0.550086,0.2445,0.107562,0.0555035

d,Be,11.6407,5.02291,2.88642,1.698,0.488912,0.265357,0.100698,0.072884

f,Be,3.32571,1.67053,0.452696,0.254672,0.150785

g,Be,0.500000,0.339542

s,Na,486.432,262.945,149.620,59.3272,24.4106,13.8553,10.3153,3.82467,2.02943,1.21138,0.626025,0.231136,  
0.099616,0.0608538,0.0116721

p,Na,121.060,45.9602,24.3319,11.7584,5.92673,3.16342,2.44801,1.25173,0.555056,0.323653,0.131738,0.0679466,  
0.0192736

d,Na,38.8902,23.7262,13.9795,7.20337,4.87595,2.54853,0.965966,0.423426,0.250862,0.102838,0.0314073

f,Na,8.74658,3.71955,2.443545,1.16754,0.529388,0.265125,0.146659,0.0877992

g,Na,5.48634,1.44688,0.514372,0.248868

s,Mg,515.399,247.482,138.454,82.3065,47.6771,31.8882,17.9990,12.3628,4.99341,1.70781,0.790449,0.275153,  
0.123443,0.0771233,0.0349975

p,Mg,145.327,58.6402,30.6960,16.3965,7.1768,3.49873,2.11780,1.51822,0.806848,0.326559,0.15472,0.0724774,  
0.0347277

d,Mg,61.9729,29.9212,16.2135,9.11394,5.57856,3.17149,1.48838,0.572001,0.392816,0.18472,0.0841238

f,Mg,11.0847,4.60912,3.30483,1.54347,0.64499,0.334225,0.174575,0.110939

g,Mg,3.84017,1.76455,0.717219,0.291521



aug-cc-pwCVQZ/MP2FIT ABS in MOLPRO format

s,Li,353.892,109.055,64.9667,20.8783,13.6826,6.48699,4.22075,1.9545,1.04023,0.429079,0.161718,0.0829282,  
0.0170155  
p,Li,69.5061,25.7524,17.5494,7.76894,5.44422,3.65992,1.87561,0.775204,0.371484,0.163201,0.076565,0.022329  
d,Li,22.2298,10.4756,6.80179,4.50953,2.21726,1.0076,0.497801,0.202532,0.11806,0.0350788  
f,Li,4.41399,2.78579,1.81962,1.03442,0.532421,0.277415,0.11709,0.0724729  
g,Li,4.36658,0.973573,0.413563,0.203462,0.137078  
h,Li,0.428565,0.167003

s,Be,479.978,136.646,58.3449,28.3921,15.5143,8.68918,4.21824,3.7802,1.16278,0.430644,0.18601,0.0973907,  
0.0453197  
p,Be,106.326,48.6208,22.2394,13.2640,6.38157,4.19726,2.5546,1.01598,0.444495,0.201832,0.0948127,0.0445393  
d,Be,53.8212,20.6066,8.49613,5.36850,3.04272,1.18451,0.584073,0.278041,0.162619,0.0814135  
f,Be,12.0828,4.52273,3.40182,1.48135,0.623318,0.344031,0.140547,0.0727809  
g,Be,6.45232,1.86007,0.53622,0.272843,0.148535  
h,Be,0.535704,0.3825

s,Na,609.215,214.738,98.3291,48.6437,28.3770,16.3062,9.60658,2.58893,3.49236,1.31021,0.608485,0.352171,  
0.185033,0.0882043,0.0506201,0.0106701  
p,Na,200.293,67.8947,25.5016,16.2568,9.43552,6.26963,2.87851,2.29751,1.32529,0.534763,0.280666,0.139646,  
0.0670942,0.0184038  
d,Na,57.8740,29.3304,12.6688,8.491,3.54451,3.17181,1.40043,0.717681,0.407893,0.269587,0.121099,0.0316729  
f,Na,17.0121,7.89065,4.8028,2.1908,1.51538,0.838895,0.358626,0.215661,0.117546,0.0600729  
g,Na,11.2370,5.74341,2.31628,1.36508,0.578782,0.297583,0.0983548  
h,Na,9.86624,5.61323,0.648943,0.298253

s,Mg,703.635,265.858,74.0329,65.1123,44.3085,23.5047,11.5247,8.174275,4.82385,1.95043,0.74041,0.429062,  
0.228177,0.126216,0.066462,0.0349955  
p,Mg,223.939,72.0405,45.366,21.3035,10.9998,6.73673,2.99693,2.25791,1.14991,0.348795,0.208905,0.106035,  
0.0588464,0.0265578  
d,Mg,69.3680,35.2442,19.4010,10.9473,5.97030,3.99744,2.10185,1.00886,0.467248,0.268153,0.155964,0.0685515  
f,Mg,21.9202,11.1046,5.8836,2.84658,2.28141,1.31819,0.439446,0.25776,0.129503,0.0646084  
g,Mg,13.4222,7.31963,2.67583,1.46206,1.09711,0.384743,0.18191  
h,Mg,5.10463,2.44242,1.0598,0.649696

aug-cc-pwCV5Z/MP2FIT ABS in MOLPRO format

s,Li,499.975,115.553,49.8112,24.2286,14.4799,7.79537,4.74962,2.89136,1.42394,0.705917,0.380123,0.246901,  
0.123532,0.0642881,0.0122985  
p,Li,40.3767,20.0939,12.0087,6.08149,4.19963,2.34726,1.59978,1.02995,0.52019,0.223276,0.121261,0.0727775,  
0.0187707  
d,Li,44.9679,24.3192,14.3724,6.96358,4.16211,2.68153,1.35163,0.771893,0.339644,0.173452,0.101078,0.0296694  
f,Li,22.9007,10.5581,5.31933,3.22949,1.34929,0.76464,0.415519,0.25928,0.156013,0.0497839  
g,Li,6.46499,3.53875,1.81964,0.856517,0.43491,0.196188,0.0843501  
h,Li,2.60102,1.18528,0.598672,0.427119,0.146929  
i,Li,0.598672,0.253741

s,Be,692.470,155.476,64.8482,33.6165,24.6783,9.86575,6.20800,5.18723,2.04825,0.941824,0.494373,0.304521,  
0.168188,0.0908364,0.0490966  
p,Be,66.2143,29.2263,19.7040,8.19087,6.13730,3.2447,2.11521,1.27464,0.594885,0.289372,0.148487,0.0785465,  
0.0425786  
d,Be,55.2100,30.8319,17.3608,9.7761,6.18372,3.81802,1.73383,0.897386,0.453927,0.238389,0.136955,0.0725133  
f,Be,30.7915,19.2209,6.44691,4.09104,1.76139,0.874992,0.497082,0.330842,0.205294,0.138098  
g,Be,8.01931,3.92822,2.35614,0.727039,0.51533,0.380351,0.160344  
h,Be,3.36781,1.50462,0.672211,0.511708,0.275472  
i,Be,0.672211,0.357670

s,Na,955.488,400.873,166.641,74.4967,36.4625,14.9579,10.7936,5.29936,2.71610,1.93777,1.01712,0.414619,  
0.224350,0.136222,0.0806265,0.0473961,0.00920948  
p,Na,406.554,93.4239,42.8202,25.3469,13.2957,8.52195,3.87851,2.91225,2.13627,1.02399,0.437132,0.223328,  
0.140095,0.0951487,0.0559091,0.0148607  
d,Na,106.059,32.4304,14.9817,9.71975,4.81039,3.46822,1.55938,1.02764,0.540694,0.288717,0.170367,0.115665,  
0.0740876,0.031284  
f,Na,22.9370,8.68901,5.41015,3.58510,1.87207,0.920046,0.457874,0.285729,0.176785,0.105124,0.0490626  
g,Na,12.3596,6.52564,3.44004,2.00507,0.833273,0.446755,0.245535,0.122323,0.100353  
h,Na,7.54404,2.50072,1.09862,0.513689,0.260977,0.125079  
i,Na,9.71738,6.35811,0.682035,0.248199

s,Mg,1204.16,540.416,221.088,102.127,43.1114,24.5418,13.4767,7.37556,4.25461,2.6068,1.29897,0.584075,  
0.330108,0.180505,0.119148,0.0691447,0.0401233  
p,Mg,433.198,123.479,41.7765,33.4832,22.9099,12.3366,8.97499,5.61338,2.42395,1.15789,0.531815,0.293408,  
0.194135,0.130156,0.0845925,0.054956  
d,Mg,81.7514,28.3542,19.8185,10.1999,8.2488,2.95615,1.94982,1.2873,0.58346,0.344419,0.22243,0.151929,

0.09125,0.0548064

f,Mg,31.8104,12.8760,6.95067,4.34398,2.76214,1.25072,0.575997,0.334257,0.216355,0.12609,0.0734838

g,Mg,16.3225,8.72565,5.06665,2.5501,1.0726,0.552581,0.30805,0.146581,0.0697491

h,Mg,10.4401,2.96262,1.51258,0.45792,0.292537,0.196604

i,Mg,5.97088,2.57957,1.07457,0.769869

cc-pwCVDZ/MP2FIT ABS in MOLPRO format

s,Li,99.9253,30.4075,14.9763,7.58805,3.98647,2.5668,0.787336,0.345354,0.160474,0.0923455  
p,Li,24.0101,6.71598,3.99706,2.33264,0.772809,0.183739,0.0783946  
d,Li,3.87398,1.49284,0.575267,0.241521,0.142015  
f,Li,1.61775,0.361631

s,Be,142.716,41.8746,21.4043,8.51217,4.30354,3.10685,1.0695,0.43143,0.213349,0.124175  
p,Be,35.6755,9.76007,4.21747,2.64058,0.788905,0.316492,0.126019  
d,Be,4.2173,2.31369,0.700086,0.353642,0.170008  
f,Be,2.02219,0.452039

s,Na,294.906,159.646,55.518,35.0886,15.3653,9.68068,5.65459,1.83236,0.640241,0.329007,0.130603,0.0504624  
p,Na,109.933,51.3091,18.6641,5.34079,3.13814,1.72797,0.908608,0.410309,0.102451,0.0616833  
d,Na,28.5633,16.944,8.94061,4.70522,2.08557,1.08925,0.528614,0.155416  
f,Na,6.12765,2.31497,1.17888,0.682956,0.27357

s,Mg,406.591,200.427,100.478,44.0693,22.107,11.9447,6.90059,2.30732,0.79142,0.442013,0.194707,0.0832303  
p,Mg,127.033,59.6825,19.5551,9.00677,5.11369,3.761,1.17635,0.594066,0.210529,0.0895356  
d,Mg,31.8814,22.3994,10.2021,6.43683,2.43961,1.18113,0.749498,0.259159  
f,Mg,7.40658,2.891,0.928774,0.601439,0.326783

cc-pwCVTZ/MP2FIT ABS in MOLPRO format

s,Li,224.500,98.0209,42.7996,20.4906,9.80609,6.23005,1.97995,1.32156,0.81248,0.302821,0.132817,0.0687151  
p,Li,28.4029,9.98153,5.34928,2.74212,1.4928,0.995132,0.455449,0.190615,0.0859203  
d,Li,8.86060,3.90895,1.71086,0.950364,0.273703,0.148839,0.0746477  
f,Li,2.64905,0.979494,0.362171,0.182526  
g,Li,0.300000

s,Be,249.463,115.41,46.1748,27.4201,12.0268,8.95789,3.30036,1.74388,1.07939,0.450645,0.186293,0.102049  
p,Be,33.2632,12.9585,6.65163,3.56324,2.10073,1.15263,0.550086,0.2445,0.107562  
d,Be,11.6407,5.02291,2.88642,1.698,0.488912,0.265357,0.100698  
f,Be,3.32571,1.67053,0.452696,0.254672  
g,Be,0.500000

s,Na,486.432,262.945,149.620,59.3272,24.4106,13.8553,10.3153,3.82467,2.02943,1.21138,0.626025,0.231136,  
0.099616,0.0608538  
p,Na,121.060,45.9602,24.3319,11.7584,5.92673,3.16342,2.44801,1.25173,0.555056,0.323653,0.131738,0.0679466  
d,Na,38.8902,23.7262,13.9795,7.20337,4.87595,2.54853,0.965966,0.423426,0.250862,0.102838  
f,Na,8.74658,3.71955,2.443545,1.16754,0.529388,0.265125,0.146659  
g,Na,5.48634,1.44688,0.514372

s,Mg,515.399,247.482,138.454,82.3065,47.6771,31.8882,17.9990,12.3628,4.99341,1.70781,0.790449,0.275153,  
0.123443,0.0771233  
p,Mg,145.327,58.6402,30.6960,16.3965,7.1768,3.49873,2.11780,1.51822,0.806848,0.326559,0.15472,0.0724774  
d,Mg,61.9729,29.9212,16.2135,9.11394,5.57856,3.17149,1.48838,0.572001,0.392816,0.18472  
f,Mg,11.0847,4.60912,3.30483,1.54347,0.64499,0.334225,0.174575  
g,Mg,3.84017,1.76455,0.717219

cc-pwCVQZ/MP2FIT ABS in MOLPRO format

s,Li,353.892,109.055,64.9667,20.8783,13.6826,6.48699,4.22075,1.9545,1.04023,0.429079,0.161718,0.0829282  
p,Li,69.5061,25.7524,17.5494,7.76894,5.44422,3.65992,1.87561,0.775204,0.371484,0.163201,0.076565  
d,Li,22.2298,10.4756,6.80179,4.50953,2.21726,1.0076,0.497801,0.202532,0.11806  
f,Li,4.41399,2.78579,1.81962,1.03442,0.532421,0.277415,0.11709  
g,Li,4.36658,0.973573,0.413563,0.203462  
h,Li,0.428565

s,Be,479.978,136.646,58.3449,28.3921,15.5143,8.68918,4.21824,3.7802,1.16278,0.430644,0.18601,0.0973907  
p,Be,106.326,48.6208,22.2394,13.2640,6.38157,4.19726,2.5546,1.01598,0.444495,0.201832,0.0948127  
d,Be,53.8212,20.6066,8.49613,5.36850,3.04272,1.18451,0.584073,0.278041,0.162619  
f,Be,12.0828,4.52273,3.40182,1.48135,0.623318,0.344031,0.140547  
g,Be,6.45232,1.86007,0.53622,0.272843  
h,Be,0.535704

s,Na,609.215,214.738,98.3291,48.6437,28.3770,16.3062,9.60658,2.58893,3.49236,1.31021,0.608485,0.352171,  
0.185033,0.0882043,0.0506201  
p,Na,200.293,67.8947,25.5016,16.2568,9.43552,6.26963,2.87851,2.29751,1.32529,0.534763,0.280666,0.139646,  
0.0670942  
d,Na,57.8740,29.3304,12.6688,8.491,3.54451,3.17181,1.40043,0.717681,0.407893,0.269587,0.121099  
f,Na,17.0121,7.89065,4.8028,2.1908,1.51538,0.838895,0.358626,0.215661,0.117546  
g,Na,11.2370,5.74341,2.31628,1.36508,0.578782,0.297583  
h,Na,9.86624,5.61323,0.648943

s,Mg,703.635,265.858,74.0329,65.1123,44.3085,23.5047,11.5247,8.174275,4.82385,1.95043,0.74041,0.429062,  
0.228177,0.126216,0.066462  
p,Mg,223.939,72.0405,45.366,21.3035,10.9998,6.73673,2.99693,2.25791,1.14991,0.348795,0.208905,0.106035,  
0.0588464  
d,Mg,69.3680,35.2442,19.4010,10.9473,5.97030,3.99744,2.10185,1.00886,0.467248,0.268153,0.155964  
f,Mg,21.9202,11.1046,5.8836,2.84658,2.28141,1.31819,0.439446,0.25776,0.129503  
g,Mg,13.4222,7.31963,2.67583,1.46206,1.09711,0.384743  
h,Mg,5.10463,2.44242,1.0598

cc-pwCV5Z/MP2FIT ABS in MOLPRO format

s,Li,499.975,115.553,49.8112,24.2286,14.4799,7.79537,4.74962,2.89136,1.42394,0.705917,0.380123,0.246901,  
0.123532,0.0642881

p,Li,40.3767,20.0939,12.0087,6.08149,4.19963,2.34726,1.59978,1.02995,0.52019,0.223276,0.121261,0.0727775

d,Li,44.9679,24.3192,14.3724,6.96358,4.16211,2.68153,1.35163,0.771893,0.339644,0.173452,0.101078

f,Li,22.9007,10.5581,5.31933,3.22949,1.34929,0.76464,0.415519,0.25928,0.156013

g,Li,6.46499,3.53875,1.81964,0.856517,0.43491,0.196188

h,Li,2.60102,1.18528,0.598672,0.427119

i,Li,0.598672

s,Be,692.470,155.476,64.8482,33.6165,24.6783,9.86575,6.20800,5.18723,2.04825,0.941824,0.494373,0.304521,  
0.168188,0.0908364

p,Be,66.2143,29.2263,19.7040,8.19087,6.13730,3.2447,2.11521,1.27464,0.594885,0.289372,0.148487,0.0785465

d,Be,55.2100,30.8319,17.3608,9.7761,6.18372,3.81802,1.73383,0.897386,0.453927,0.238389,0.136955

f,Be,30.7915,19.2209,6.44691,4.09104,1.76139,0.874992,0.497082,0.330842,0.205294

g,Be,8.01931,3.92822,2.35614,0.727039,0.51533,0.380351

h,Be,3.36781,1.50462,0.672211,0.511708

i,Be,0.672211

s,Na,955.488,400.873,166.641,74.4967,36.4625,14.9579,10.7936,5.29936,2.71610,1.93777,1.01712,0.414619,  
0.224350,0.136222,0.0806265,0.0473961

p,Na,406.554,93.4239,42.8202,25.3469,13.2957,8.52195,3.87851,2.91225,2.13627,1.02399,0.437132,0.223328,  
0.140095,0.0951487,0.0559091

d,Na,106.059,32.4304,14.9817,9.71975,4.81039,3.46822,1.55938,1.02764,0.540694,0.288717,0.170367,0.115665,  
0.0740876

f,Na,22.9370,8.68901,5.41015,3.58510,1.87207,0.920046,0.457874,0.285729,0.176785,0.105124

g,Na,12.3596,6.52564,3.44004,2.00507,0.833273,0.446755,0.245535,0.122323

h,Na,7.54404,2.50072,1.09862,0.513689,0.260977

i,Na,9.71738,6.35811,0.682035

s,Mg,1204.16,540.416,221.088,102.127,43.1114,24.5418,13.4767,7.37556,4.25461,2.6068,1.29897,0.584075,  
0.330108,0.180505,0.119148,0.0691447

p,Mg,433.198,123.479,41.7765,33.4832,22.9099,12.3366,8.97499,5.61338,2.42395,1.15789,0.531815,0.293408,  
0.194135,0.130156,0.0845925

d,Mg,81.7514,28.3542,19.8185,10.1999,8.2488,2.95615,1.94982,1.2873,0.58346,0.344419,0.22243,0.151929,  
0.09125

f,Mg,31.8104,12.8760,6.95067,4.34398,2.76214,1.25072,0.575997,0.334257,0.216355,0.12609

g,Mg,16.3225,8.72565,5.06665,2.5501,1.0726,0.552581,0.30805,0.146581  
h,Mg,10.4401,2.96262,1.51258,0.45792,0.292537  
i,Mg,5.97088,2.57957,1.07457
